# Supplementary material
Source: PubMed Central journal article supplement (PMC8593625)

Suppl. Fig 4A

Age and frequencies of immunization at D28  
(serum anti-S IgG  $\geq 50$  AU/mL)

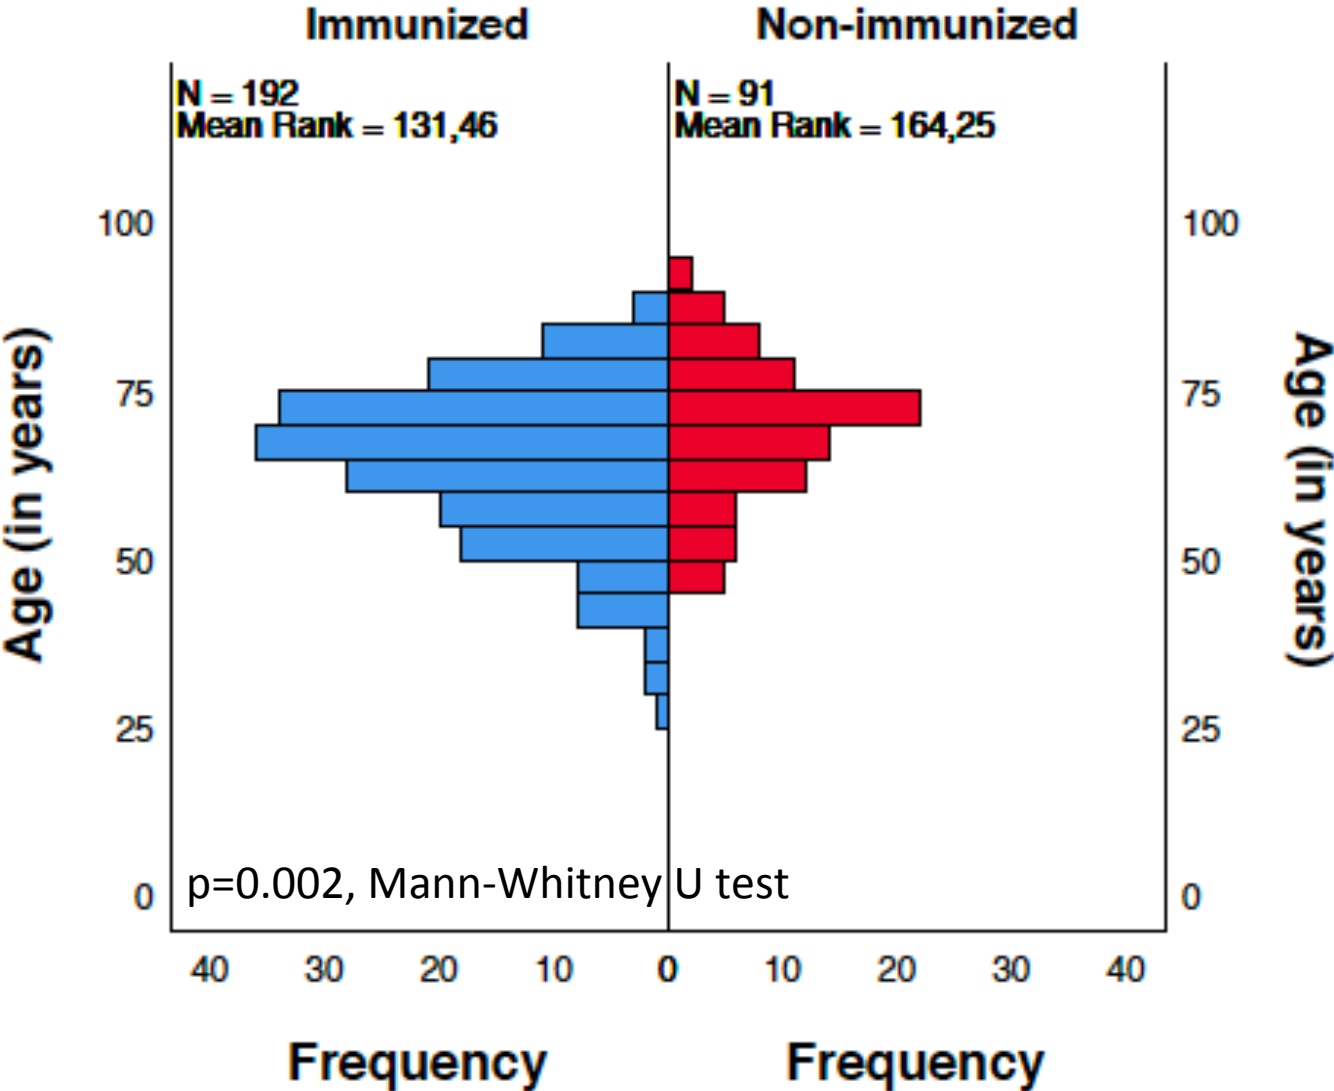

Suppl. Fig 4B

T-lymphocytes count and frequencies of immunization at D28  
(serum anti-S IgG  $\geq 50$  AU/mL)  $n=122$

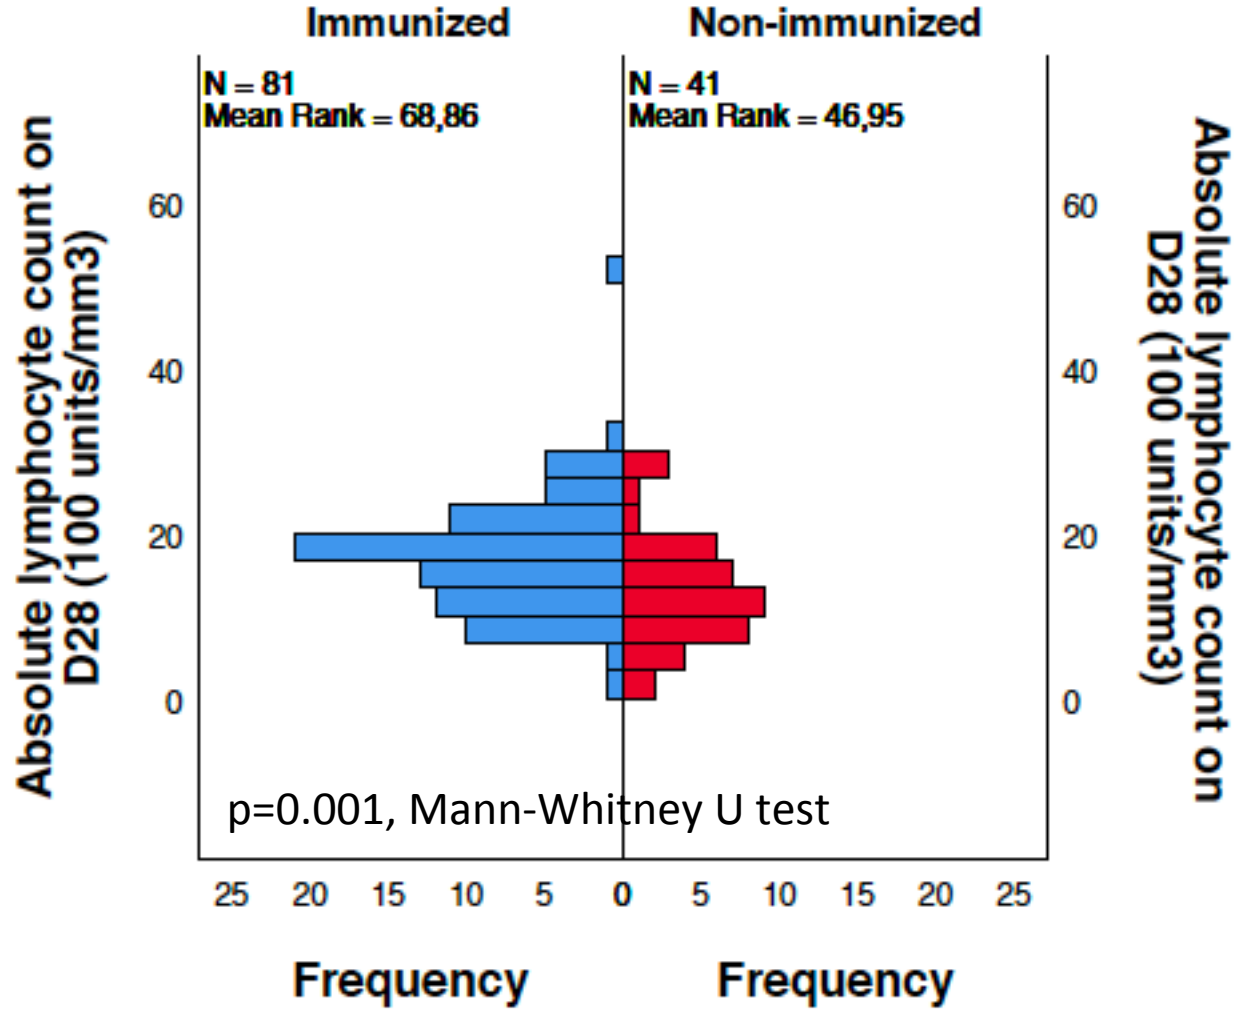

Suppl. Fig 4C

Age and frequencies of immunization at D28  
(serum anti-S IgG  $\geq 300$  AU/mL)

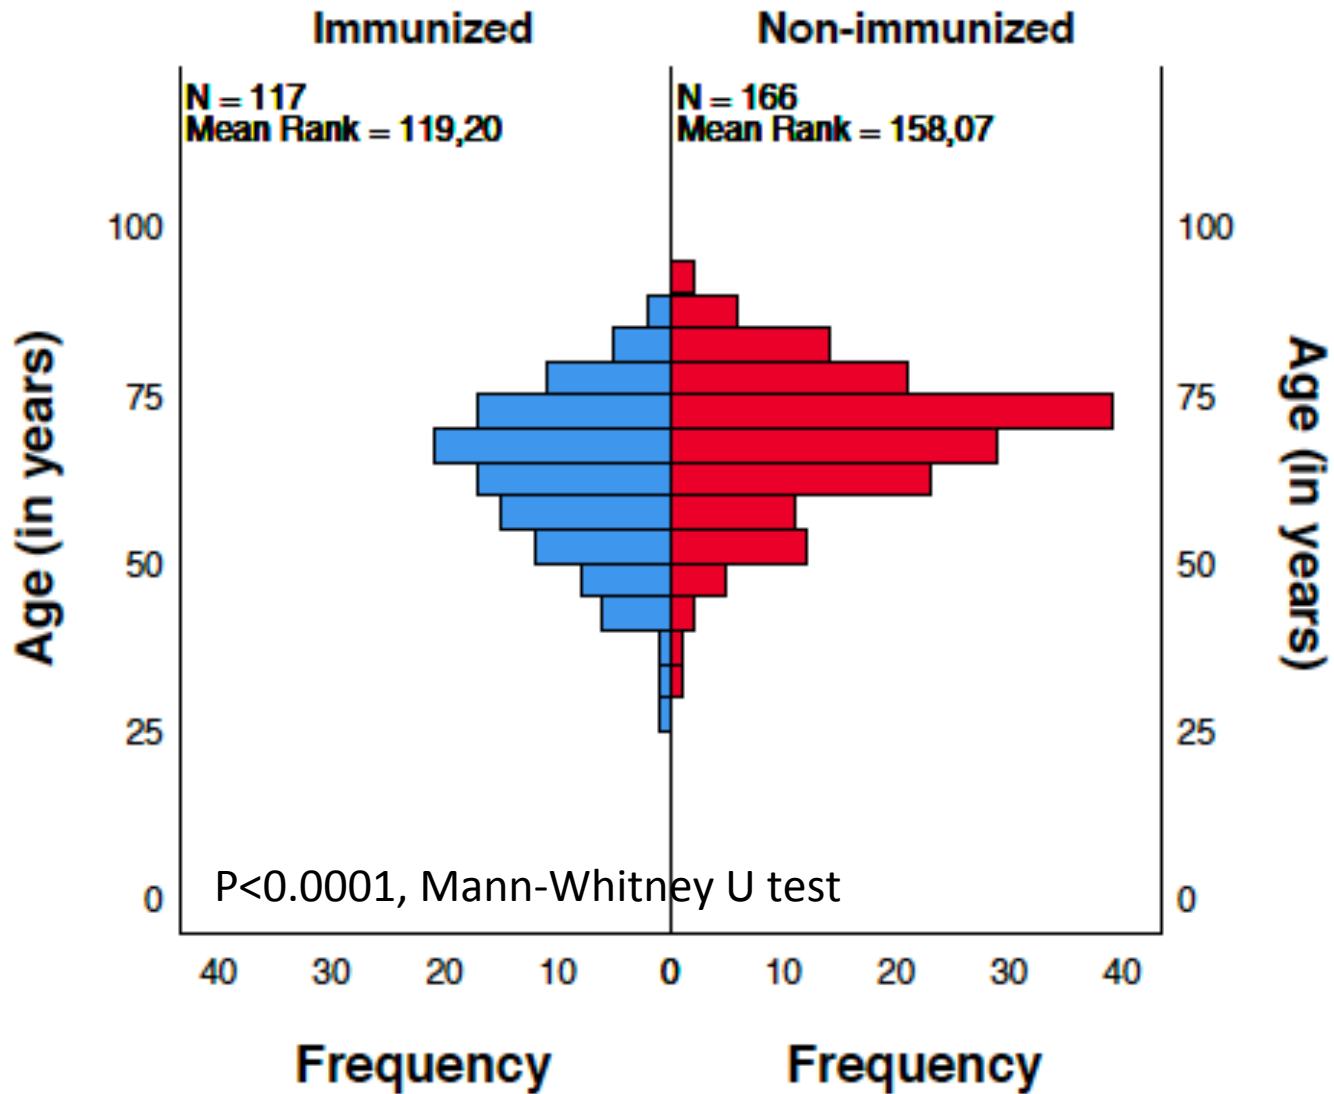

Supplement: mmc12.pdf [file mmc12.pdf]
