# Supplementary material
Source: PubMed Central journal article supplement (PMC8593625)

Suppl. Fig.2

### Spike RBD-pseudoneutralization and anti-S IgG SARS-CoV-2 antibodies correlation

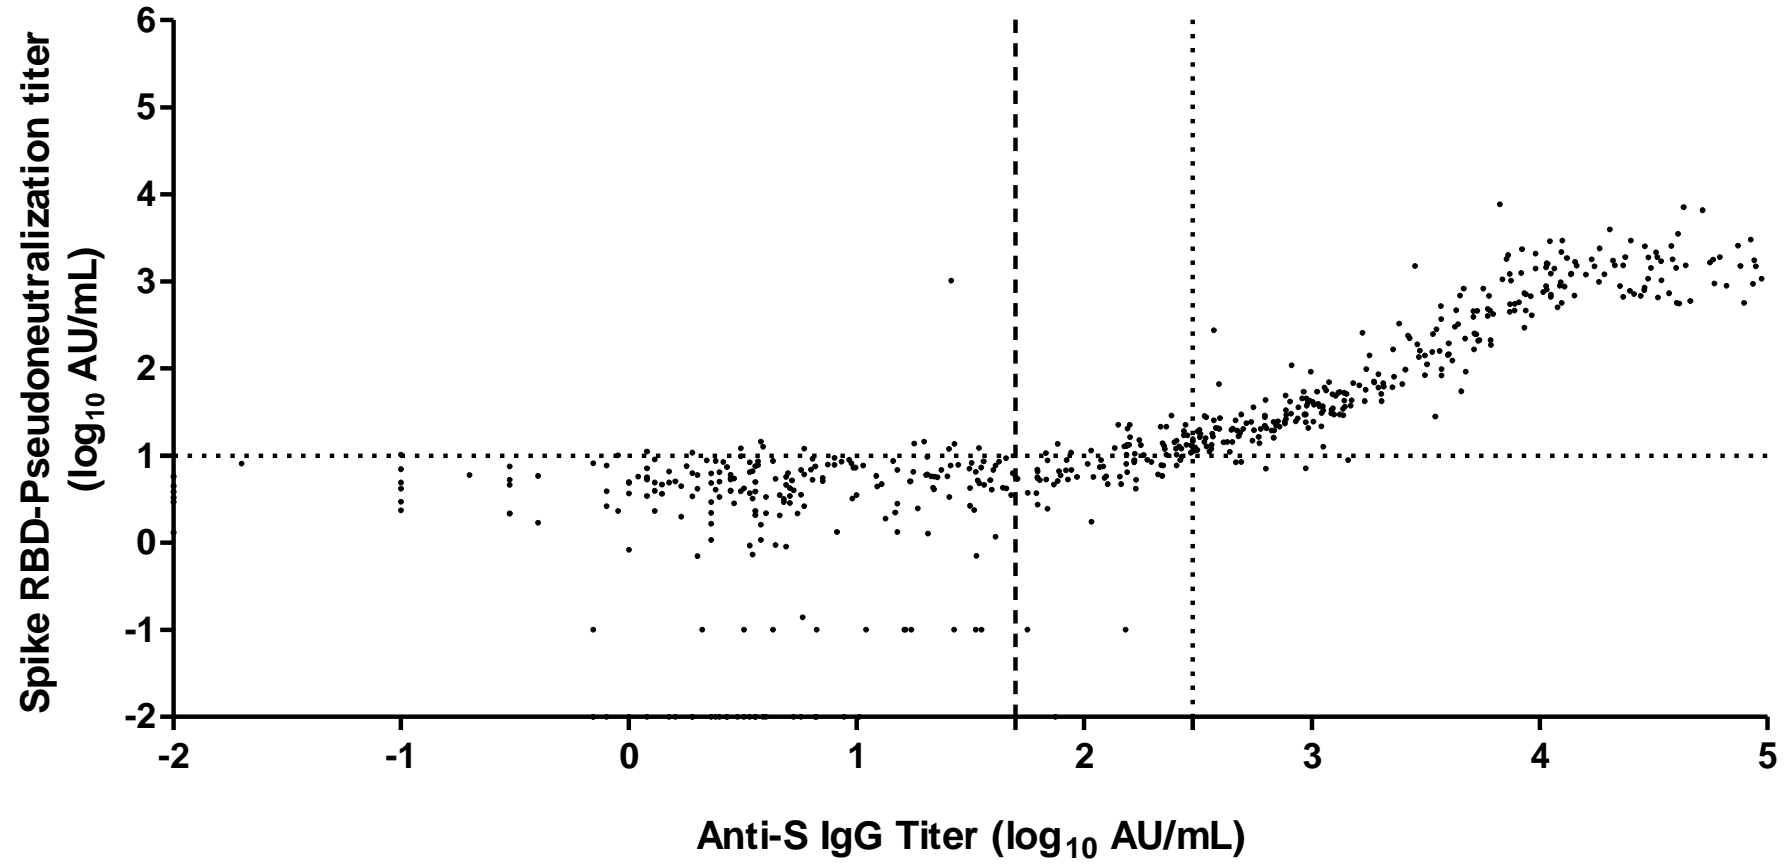

Supplement: mmc10.pdf [file mmc10.pdf]

## Anti-SARS-CoV-2 Spike IgG in vaccinated patients with thoracic cancer post-SARS-CoV-2 infection

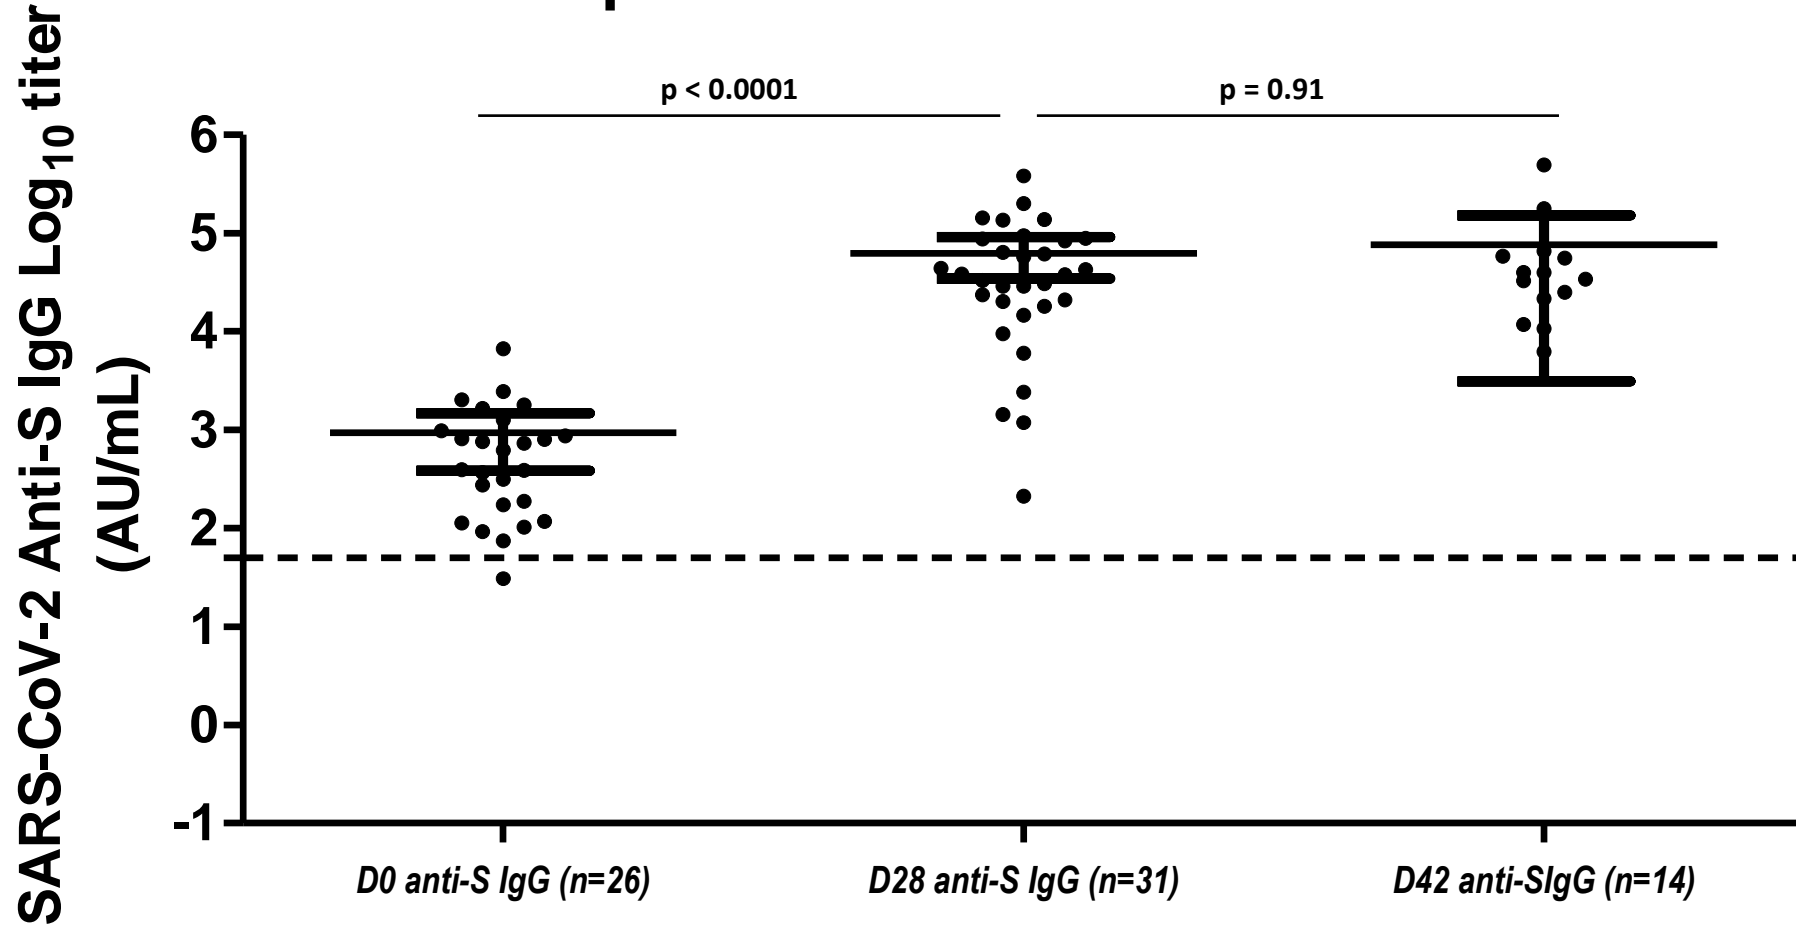

Supplement: mmc11.pdf [file mmc11.pdf]

# Patient & serology disposition

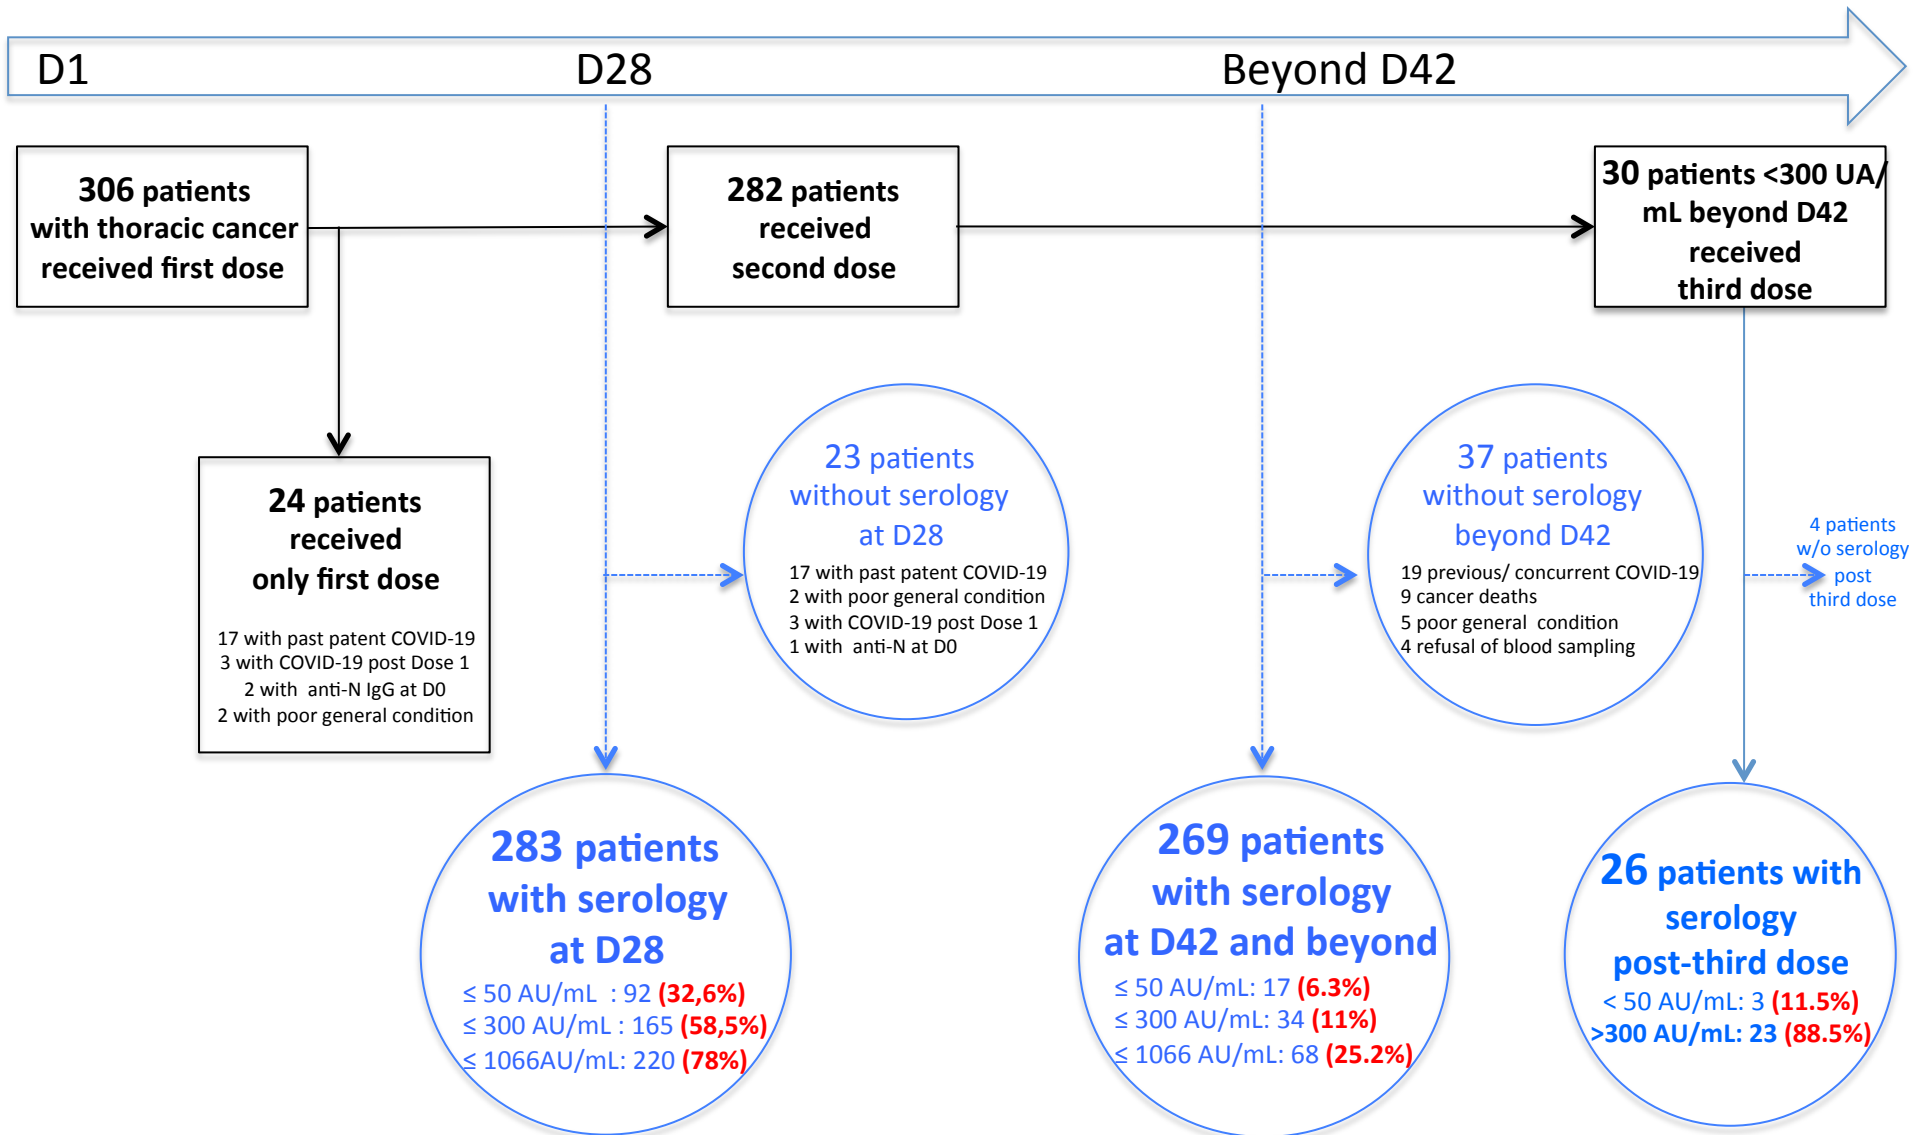

248 patients with serology samplings at D28 and beyond D42

Supplement: mmc9.pdf [file mmc9.pdf]
